# Supplementary material
Source: Springer Nature journal article supplement (https://www.springermedizin.de/resource/supplementary/12913_2014_3466_MOESM3_ESM.pdf/9532916)
Supplement: MOESM3 [file 9532916]

**Additional file 3: Comparison of results for a subset of studies with common objective of investigating health workers' preference for jobs in rural areas in low- and middle-income countries)**

VND = Vietnamese dong; USD = United States dollar; Tied rankings indicated by “=”; See References in main text for details of publications; \*Rockers *et al* 2013 presents willingness to pay estimates for single interventions for nurses and nursing students only, whereas Jaskiewicz *et al* presents only packages of interventions

| Authors*            | Analytic approach                                                          | Results of relative attribute impact analysis<br>(ranked from most preferred to least preferred)                                                                                                                              |                                                                                                                                                                                                                                      |                                                                                                                                                                                                                                  |
|---------------------|----------------------------------------------------------------------------|-------------------------------------------------------------------------------------------------------------------------------------------------------------------------------------------------------------------------------|--------------------------------------------------------------------------------------------------------------------------------------------------------------------------------------------------------------------------------------|----------------------------------------------------------------------------------------------------------------------------------------------------------------------------------------------------------------------------------|
| Hanson and Jack     | Marginal willingness to pay                                                | <b>Doctors:</b><br>Private practice<br>Superior housing<br>Job in Addis Ababa (national capital)<br>Adequate equipment<br>Two-year time commitment                                                                            |                                                                                                                                                                                                                                      | <b>Nurses:</b><br>Job in zonal capital<br>Adequate equipment<br>Superior housing<br>Improved supervision<br>Two-year time commitment                                                                                             |
| Blaauw <i>et al</i> | Predicted probabilities of uptake of rural post under different incentives | <b>Kenya:</b><br>30% rural allowance<br>20% rural allowance<br>Preferential training opportunities<br>More rapid promotion<br>10% rural allowance<br>Better rural housing<br>Relational management culture<br>Benefit package | <b>South Africa:</b><br>30% rural allowance<br>Preferential training opportunities<br>20% rural allowance<br>10% rural allowance<br>Benefit package<br>More rapid promotion<br>Better rural housing<br>Relational management culture | <b>Thailand:</b><br>Benefit package<br>Relational management culture<br>More rapid promotion<br>30% rural allowance<br>Better rural housing<br>20% rural allowance<br>10% rural allowance<br>Preferential training opportunities |
| Kruk <i>et al</i>   | Predicted probabilities of uptake of rural post under different incentives | Improved infrastructure<br>100% salary increase<br>Supportive management<br>Study leave after 2 years<br>Utility car provided<br>Allowance for children's education<br>Superior housing                                       |                                                                                                                                                                                                                                      |                                                                                                                                                                                                                                  |

|                                    |                                                                            |                                                                                                                                                                                                                                                          |                                                                                                                                                                                      |                                                                                                                                                                                |                                                                                                                                                                                 |
|------------------------------------|----------------------------------------------------------------------------|----------------------------------------------------------------------------------------------------------------------------------------------------------------------------------------------------------------------------------------------------------|--------------------------------------------------------------------------------------------------------------------------------------------------------------------------------------|--------------------------------------------------------------------------------------------------------------------------------------------------------------------------------|---------------------------------------------------------------------------------------------------------------------------------------------------------------------------------|
|                                    |                                                                            | 50% salary increase<br>30% salary increase<br>No housing (compared to basic housing)                                                                                                                                                                     |                                                                                                                                                                                      |                                                                                                                                                                                |                                                                                                                                                                                 |
| Vujicic <i>et al</i><br>(Vietnam)  | Predicted probabilities of uptake of rural post under different incentives | VND 3 million financial bonus<br>VND 2 million financial bonus = Provision of long-term education = Improvement of equipment<br>Provision of short-term training<br>VND 1 million financial bonus<br>Provision of housing<br>VND 500,000 financial bonus |                                                                                                                                                                                      |                                                                                                                                                                                |                                                                                                                                                                                 |
| Vujicic <i>et al</i><br>(Liberia)  | Predicted probabilities of uptake of rural post under different incentives | Increase pay by USD150<br>Increase pay by USD100<br>Provide housing<br>Provide transportation<br>Increase pay by USD50<br>Improve equipment<br>Increase pay by USD25                                                                                     |                                                                                                                                                                                      |                                                                                                                                                                                |                                                                                                                                                                                 |
| Lagarde <i>et al</i><br>(Thailand) | Predicted probabilities of uptake of rural post under different incentives | Workplace close to home province<br>Place in quota for specialty training<br>45% rural incentive<br>Consultant supervision<br>On-call 7 nights per month (compared to 14 nights)<br>1 year before promotion (compared to two)<br>30% rural incentive     |                                                                                                                                                                                      |                                                                                                                                                                                |                                                                                                                                                                                 |
| Rockers <i>et al</i><br>2012       | Marginal willingness to pay                                                | <b>Medical students:</b><br>Tuition support for training<br>Advanced facility quality<br>2 year commitment<br>Housing allowance<br>Housing provided<br>Supportive management                                                                             | <b>Nursing students:</b><br>Advanced facility quality<br>Supportive management<br>Housing allowance = Housing provided<br>Full staff levels<br>25% understaffed<br>2 year commitment | <b>Pharmacy students:</b><br>Ownership of private pharmacy<br>Housing provided<br>Housing allowance<br>Advanced facility quality<br>Supportive management<br>2 year commitment | <b>Laboratory students:</b><br>Advanced facility quality<br>Tuition support for training<br>Housing provided<br>Housing allowance<br>Supportive management<br>2 year commitment |

|                      |                                                                            |                                                                                                                                                                                                           |
|----------------------|----------------------------------------------------------------------------|-----------------------------------------------------------------------------------------------------------------------------------------------------------------------------------------------------------|
| Miranda <i>et al</i> | Predicted probabilities of uptake of rural post under different incentives | 75% rural allowance<br>50% rural allowance<br>Permanent contract after 2 years<br>20 points for specialisation<br>25% rural allowance<br>Permanent contract after 4 years<br>10 points for specialisation |
|----------------------|----------------------------------------------------------------------------|-----------------------------------------------------------------------------------------------------------------------------------------------------------------------------------------------------------|
